# Supplementary material for: Sustainable β-cyclodextrin/polyethylenimine-encapsulated activated algae hydrogel beads for high-capacity Cd(ii) removal: adsorption performance, mechanism, thermodynamics, and Box–Behnken optimization
Source: Royal Society of Chemistry journal article supplement (doi:10.1039/d6ra00411c), 2026-04-07
Supplement: d6ra00411c1.pdf [file d6ra00411c1.pdf]

**Sustainable  $\beta$ -Cyclodextrin/Polyethylenimine-Encapsulated Activated Algae Hydrogel Beads for High-Capacity Cd(II) Removal: Adsorption Performance, Mechanism, Thermodynamics, and Box–Behnken Optimization**

Table S1. Chemical name, formula, and company.

| <b>Chemical name</b>  | <b>Formula</b>           | <b>Company</b>                             |
|-----------------------|--------------------------|--------------------------------------------|
| Polyethylenimine      | $C_{24}H_{63}N_{13}$     | Sigma-Aldrich, Germany                     |
| $\beta$ -Cyclodextrin | $C_{42}H_{70}O_{35}$     | Sinopharm Chemical Reagent Co., Ltd, China |
| Epichlorohydrin, 99%  | $C_3H_5ClO$              | Thermoscientafic                           |
| Algae                 |                          | Beach of mediterinane sea                  |
| Cadmium acetate       | $Cd(CH_3CO_2)_2(H_2O)_2$ | Sigma-Aldrich, Germany                     |
| Sodium hydroxide      | NaOH                     | LOBA CHEMIE PVT.LTD, India                 |
| Hydrochloric acid 37% | HCl                      | LOBA CHEMIE PVT.LTD, India                 |
| Ethanol               | $C_2H_5OH$               | LOBA CHEMIE PVT.LTD, India                 |
| Methanol              | $CH_3OH$                 | LOBA CHEMIE PVT.LTD, India                 |

Table S2. Instruments and equipments.

| Test name                        | Abbreviation | Instrument name                                                               | Company                                    | Illustration                                                                                                                                                                                                                         |
|----------------------------------|--------------|-------------------------------------------------------------------------------|--------------------------------------------|--------------------------------------------------------------------------------------------------------------------------------------------------------------------------------------------------------------------------------------|
| Fourier transformer infrared     | FT-IR        | A Nicolet IS10 Fourier transform infrared (FTIR) spectrometer                 | Thermo Fisher Scientific, Waltham, MA, USA | equipped with an attenuated total reflectance accessory and which ran in the 4000-400 $\text{cm}^{-1}$ range was used to gather FTIR spectra                                                                                         |
| Powered X-ray diffraction        | PXRD         | Siemens diffractometer (model D500, Germany)                                  | Germany                                    | patterns were captured from powder samples through the use of a Siemens diffractometer (model D500, Germany) that was fitted with a Cu-K radiation source (wavelength 1.54 Angstroms ( $\text{\AA}$ )) operating at 30 kV and 20 mA. |
| Scanning Electron Microscope     | SEM          | (JSM-6510LV, JEOL Ltd., Tokyo, Japan)                                         | JEOL Ltd., Tokyo, Japan                    | The morphology of the investigated sorbents was analyzed with the use of a scanning electron microscope                                                                                                                              |
| X-ray photoelectron spectroscopy | XPS          | K-ALPHA (Thermo Fisher Scientific, USA)                                       | Thermo Fisher Scientific, USA              | Used for determination the elemental analysis for the compound                                                                                                                                                                       |
| Braunnar Emmet Teller            | BET          | Quantachrome Instruments, Anton Paar Quanta Tec, Inc., Boynton Beach, FL, USA | Quanta Tec, Inc., Boynton Beach, FL, USA   | was utilised for surface and pore analysis (Brunauer Emmett-Teller (BET) surface area, porous volume, and pore size), and NovaWin Software (v11.0) was used for data interpretation.                                                 |

|                                  |            |                                                                      |                                        |                                                                                                                                                                                                            |
|----------------------------------|------------|----------------------------------------------------------------------|----------------------------------------|------------------------------------------------------------------------------------------------------------------------------------------------------------------------------------------------------------|
|                                  |            | USA                                                                  |                                        | The BET surface area of material adsorbents was obtained by the application of nitrogen adsorption-desorption isotherms at 77K through the use of a specific analyser (Quadratorb-EVO, Quantachrome, USA). |
| Atomic adsorption spectrometer   |            | PerkinElmer atomic absorption spectrometer (PinAAcle 500), Singapore | PerkinElmer, Singapore                 | Measuring the metal ion concentration.                                                                                                                                                                     |
| Energy Dispersive X-ray          | EDX        | Leo1430VP microscope                                                 | Carl Zeiss AG, Jena, Germany           | Elemental analysis of the material                                                                                                                                                                         |
| Transmission electron microscopy | TEM        | TEM, FEI Teanci G2 F20, USA                                          | FEI Teanci G2 F20, USA                 | Determination the morphology of the material and size                                                                                                                                                      |
| pH meter                         | pH         | HANNA (model 211)                                                    | USA                                    | Measuring the acidity or basicity of the solution                                                                                                                                                          |
| Sonication                       | Ultrasonic | Elmasonic P300H ultrasonic bath, continuous mode, power 380 W        | Elma Schmidbauer GmbH, Singen, Germany | Sonication of the material as well as used to disperse material on the solution as it decrease the particle size of the material                                                                           |
| Water bath                       | Shaking    | GFL Orbital Shaker 3017                                              |                                        |                                                                                                                                                                                                            |

Table S3. True variables for the adsorption process factors.

| <b>Factors</b>        | <b>pH</b> | <b>Time<br/>(min.)</b> | <b>Initial concentration<br/>(mg/L)</b> | <b>Temperature<br/>(°C)</b> | <b>Dose<br/>(g)</b> |
|-----------------------|-----------|------------------------|-----------------------------------------|-----------------------------|---------------------|
| pH                    | 2-8       | 30                     | 200                                     | 25                          | 0.02                |
| Dose (g)              | 6         | 30                     | 300                                     | 25                          | 0.02-<br>0.5        |
| Initial concentration | 6         | 100                    | 20-380                                  | 25                          | 0.02                |
| Time (min.)           | 6         | 5-100                  | 300                                     | 25-45                       | 0.02                |
| Temperature           | 6         | 30                     | 300                                     | 20-45                       | 0.02                |

Table S4. True variables, codes, and their BBD levels.

| <b>Code</b> | <b>Variables</b> | <b>-1</b> | <b>0</b> | <b>+1</b> |
|-------------|------------------|-----------|----------|-----------|
| A           | pH               | 2         | 7        | 12        |
| B           | Dose (g)         | 0.02      | 0.26     | 0.5       |
| C           | Time (min.)      | 5         | 55.5     | 100       |

Table S5. Crystallographic data.

| <b><i>hkl</i></b> | <b>2θ Observed</b> | <b>2θ Calculated</b> | <b>Difference</b> |
|-------------------|--------------------|----------------------|-------------------|
| -1 2 1            | 12.5281            | 12.4945              | 0.0336            |
| 1 1 1             | 17.1265            | 17.0705              | 0.056             |
| -2 0 0            | 18.6877            | 18.6408              | 0.0469            |
| -2 2 0            | 20.3658            | 20.3251              | 0.0407            |
| 0 5 1             | 22.5096            | 22.4675              | 0.0421            |
| -1 4 2            | 23.5758            | 23.525               | 0.0508            |
| -1 5 2            | 26.5393            | 26.5139              | 0.0254            |
| 2 3 1             | 28.0104            | 27.9779              | 0.0325            |
| -3 1 0            | 28.454             | 28.4159              | 0.0381            |
| -3 2 0            | 29.2759            | 29.289               | -0.0131           |
| -3 2 3            | 30.0752            | 30.0847              | -0.0095           |

|    |    |   |         |         |         |
|----|----|---|---------|---------|---------|
| -2 | 6  | 2 | 31.1357 | 31.1023 | 0.0334  |
| -3 | 4  | 0 | 32.5596 | 32.5682 | -0.0086 |
| -1 | 5  | 3 | 33.3631 | 33.3265 | 0.0366  |
| -4 | 0  | 1 | 33.8129 | 33.7995 | 0.0134  |
| -2 | 2  | 4 | 35.4326 | 35.4516 | -0.019  |
| -1 | 0  | 4 | 36.0592 | 36.0696 | -0.0104 |
| -3 | 2  | 4 | 36.4646 | 36.4396 | 0.025   |
| -1 | 2  | 4 | 37.0402 | 37.0131 | 0.0271  |
| -1 | 3  | 4 | 38.1712 | 38.1642 | 0.007   |
| -4 | 3  | 0 | 39.8749 | 39.8159 | 0.059   |
| 1  | 9  | 1 | 40.5121 | 40.5481 | -0.036  |
| -1 | 5  | 4 | 41.6241 | 41.6666 | -0.0425 |
| 3  | 2  | 2 | 43.0536 | 43.0735 | -0.0199 |
| -2 | 1  | 5 | 44.1067 | 44.1071 | -0.0004 |
| 1  | 1  | 4 | 45.93   | 45.9769 | -0.0469 |
| -1 | 7  | 4 | 46.5032 | 46.5121 | -0.0089 |
| 0  | 6  | 4 | 47.3209 | 47.3336 | -0.0127 |
| -5 | 5  | 1 | 48.2914 | 48.276  | 0.0154  |
| -4 | 8  | 4 | 51.5845 | 51.6058 | -0.0213 |
| 1  | 12 | 1 | 52.7499 | 52.7392 | 0.0107  |
| 2  | 2  | 4 | 53.6503 | 53.644  | 0.0063  |
| -1 | 13 | 1 | 55.1186 | 55.1176 | 0.001   |
| 4  | 5  | 2 | 55.9705 | 55.9803 | -0.0098 |
| -6 | 6  | 4 | 57.4181 | 57.4315 | -0.0134 |
| -7 | 1  | 3 | 59.017  | 59.0423 | -0.0253 |
| -7 | 2  | 4 | 59.8432 | 59.8874 | -0.0442 |
| -7 | 4  | 2 | 63.0221 | 63.0165 | 0.0056  |
| 5  | 3  | 3 | 71.9132 | 71.9115 | 0.0017  |
| -5 | 0  | 8 | 73.106  | 73.1115 | -0.0055 |
| -8 | 5  | 2 | 74.7806 | 74.7708 | 0.0098  |

Table S6. Equations used in this work to fit the data of adsorption experiments.

| Serial | Equation                                                                                                                        | Nmae                 | Description                                                                                                                                                                                                                                                                                                                                                                                                                                                                                                                                                                                                                                                                                                                                                                          | Ref. |
|--------|---------------------------------------------------------------------------------------------------------------------------------|----------------------|--------------------------------------------------------------------------------------------------------------------------------------------------------------------------------------------------------------------------------------------------------------------------------------------------------------------------------------------------------------------------------------------------------------------------------------------------------------------------------------------------------------------------------------------------------------------------------------------------------------------------------------------------------------------------------------------------------------------------------------------------------------------------------------|------|
| 1      | $q_e = \frac{q_m}{1 + K_L C_e}$                                                                                                 | Langmuir             | <p><math>q_e</math> (<math>\text{mg}\cdot\text{g}^{-1}</math>) Adsorption capacity, <math>C_e</math> equilibrium concentration, <math>q_m</math> (<math>\text{mg}\cdot\text{g}^{-1}</math>) is the monolayer saturation capacity constant and <math>K_L</math> (<math>\text{L}/\text{mg}</math>) is the Langmuir constant associated with the free adsorption energy.</p> <p>The favorability of the adsorption process in the Langmuir model is determined by means of the <math>R_L</math> dimensionless factor (<math>R_L = 1/(1 + k_L \cdot C_0)</math>) as follows: <math>R_L = 0</math>, <math>0 &lt; R_L &lt; 1</math>, <math>R_L = 1</math>, and <math>R_L &gt; 1</math> indicating irreversible, favorable, linear, and unfavorable adsorption isotherms, respectively.</p> | [1]  |
| 2      | $q_e = K_F C_e^{\frac{1}{n}}$                                                                                                   | Freundlich           | <p><math>K_F</math> Freundlich isotherm constants [<math>(\text{mg}/\text{g})/(\text{mg}/\text{L})^{1/n}</math>], and <math>1/n</math> represents the exponent of non-linearity (i.e., C-type, L-type, and S-type isotherms). <math>n</math> is the Freundlich constants, and <math>n &lt; 1</math> indicates poor adsorption while <math>n = 1-2</math> and <math>n = 2-10</math> indicate average and good adsorptions, respectively. The values of <math>n</math> and <math>k_f</math> are calculated, respectively</p>                                                                                                                                                                                                                                                           | [2]  |
| 3      | $q_e = q_m \exp(-\beta \varepsilon^2)$ $\varepsilon = RT \ln\left(1 + \frac{1}{C_e}\right)$ $E_{DR} = \sqrt{\frac{1}{2K_{DR}}}$ | Dubinin–Radushkevich | <p><math>q_D</math> is the maximum monolayer adsorption capacity (<math>\text{mg}/\text{g}</math>), <math>B_D</math> is the activity coefficient related to the apparent free energy of adsorbate adsorption onto the adsorbent (<math>\text{mol}^2/\text{kJ}^2</math>), <math>\varepsilon_D</math> is the Polanyi potential which is related to the equilibrium concentration, and <math>E</math> is the mean adsorption energy.</p>                                                                                                                                                                                                                                                                                                                                                | [3]  |
| 4      | $q_e = Q_{max} \frac{RT}{b \ln(K_T C_e)}$                                                                                       | Temkin               | <p><math>K_T</math> is the Temkin isotherm constant or equilibrium binding constant (<math>\text{L}/\text{mg}</math>) corresponding to the maximum binding energy, and <math>b_T</math> is the Temkin isotherm constant related to the heat of adsorbate adsorption onto the adsorbent due to adsorbent-adsorbate interaction (<math>\text{J}/\text{mol}</math>), <math>R</math> is the gas constant (<math>8.314 \text{ J}/\text{mol}/\text{K}</math>), and <math>T</math> is the absolute temperature (herein 298 K).</p>                                                                                                                                                                                                                                                          | [4]  |

|    |                                                                  |                             |                                                                                                                                                                                                                                                                                                                                                                                                                                                                                                                                                                                                                                                                  |
|----|------------------------------------------------------------------|-----------------------------|------------------------------------------------------------------------------------------------------------------------------------------------------------------------------------------------------------------------------------------------------------------------------------------------------------------------------------------------------------------------------------------------------------------------------------------------------------------------------------------------------------------------------------------------------------------------------------------------------------------------------------------------------------------|
| 5  | $q_e = \frac{KC_e}{1 + JC_e^n}$                                  | Jossens                     | The Jossens adsorption isotherm defines the relationship between adsorbate amount ( $q_e$ , mg g <sup>-1</sup> ) and its concentration ( $C_e$ , mg L <sup>-1</sup> ). The maximum capacity ( $q_m$ , mg g <sup>-1</sup> ) reflects the theoretical limit of filled sites. The affinity constant ( $K$ , L mg <sup>-1</sup> ) shows interaction strength; higher values mean stronger forces. The heterogeneity factor ( $n$ ) indicates variance in adsorption behavior values near one suggest Langmuir behavior, while others point to heterogeneous adsorption. These parameters are typically estimated via non-linear regression of experimental data. [5] |
| 6  | $q_t = q_e(1 - e^{-k_1 t})$                                      | Pseudo-First-order kinetic  | $q_e$ and $q_t$ are the adsorption capacities at equilibrium and time $t$ (mg/g), and $k_1$ is the rate constant (min <sup>-1</sup> ), respectively. [6]                                                                                                                                                                                                                                                                                                                                                                                                                                                                                                         |
| 7  | $q_t = \frac{tK_2q_e^2}{1 + q_eK_2t}$                            | Pseudo-Second-order kinetic | $k_2$ is the pseudo-second order constant (mg/(g.min)) [7]                                                                                                                                                                                                                                                                                                                                                                                                                                                                                                                                                                                                       |
| 8  | $q_t = K_i t^{1/2} + X$                                          | Intraparticle diffusion     | $q_t$ is the adsorption capacity at time $t$ in (mg/g), $k_{int}$ is the intraparticle diffusion rate constant (mg.g <sup>-1</sup> .min <sup>-1/2</sup> ), and $C$ is a constant related to the thickness of the boundary layer (mg/g). [8]                                                                                                                                                                                                                                                                                                                                                                                                                      |
| 9  | $q_t = \frac{1}{\beta} \ln(\alpha\beta t + 1)$                   | Elovich                     | The constants $\alpha$ chemical adsorption rate (mg.g <sup>-1</sup> min <sup>-1</sup> ), and $\beta$ Coefficient in relation with extension of covered surface [9]                                                                                                                                                                                                                                                                                                                                                                                                                                                                                               |
| 10 | $\Delta G^\circ = \Delta H^\circ - T\Delta S^\circ$              | Gibbs free energy           | $\Delta G^\circ$ : Gibbs free energy change; $K_d$ : equilibrium constant; $R$ : gas constant; $T$ : temperature. [10]                                                                                                                                                                                                                                                                                                                                                                                                                                                                                                                                           |
| 11 | $\ln K_d = \frac{\Delta S^\circ}{R} - \frac{\Delta H^\circ}{RT}$ | Van't Hoff                  | $\Delta S^\circ$ : entropy change; $\Delta H^\circ$ : enthalpy change. [11]                                                                                                                                                                                                                                                                                                                                                                                                                                                                                                                                                                                      |
| 12 | $\ln K_d = \ln A - \left(\frac{E_a}{R}\right) \frac{1}{T}$       | Arrhenius                   | $E_a$ was the activation energy, $A$ Arrhenius constant, $R$ ideal gas constant 8.314 J/mol K, $T$ (K) is the absolute solution temperature [12]                                                                                                                                                                                                                                                                                                                                                                                                                                                                                                                 |

Table S7. The parameter of the adsorption isotherm for Cd(II) ions on FAACP hydrogel beads.

| Isotherm                           | Value of parameters                           |            |             |             |
|------------------------------------|-----------------------------------------------|------------|-------------|-------------|
|                                    | Parameters                                    | 25 °C      | 35 °C       | 45 °C       |
| Langmuir                           | $q_{m \text{ exp}}$ (mg/g)                    | 254.75     | 355.26      | 425.84      |
|                                    | $q_m$ (mg/g)                                  | 256.82     | 359.2       | 428.8       |
|                                    | $K_L$ (L/mg)                                  | 0.042      | 0.04628     | 0.079       |
|                                    | $R_L$                                         | 0.17       | 0.15        | 0.10        |
|                                    | Reduced Chi-Sqr                               | 28.83295   | 49.90252    | 108.64149   |
|                                    | Residual Sum of Squares                       | 461.32728  | 798.44031   | 1738.26384  |
|                                    | R-Square (COD)                                | 0.99648    | 0.99658     | 0.99468     |
|                                    | Adj. R-Square                                 | 0.99626    | 0.99637     | 0.99435     |
|                                    | $R^2$                                         | 0.995      | 0.9961      | 0.9938      |
|                                    | Freundlich                                    | n          | 2.68        | 2.21        |
| $K_F$ (mg/g) (L/mg) <sup>1/n</sup> |                                               | 41.089     | 46.9        | 67.21       |
| Reduced Chi-Sqr                    |                                               | 493.17842  | 333.17728   | 280.8034    |
| Residual Sum of Squares            |                                               | 7890.85477 | 5330.83652  | 4212.05094  |
| R-Square (COD)                     |                                               | 0.93972    | 0.97718     | 0.9848      |
| Adj. R-Square                      |                                               | 0.93595    | 0.97575     | 0.98379     |
| $R^2$                              |                                               | 0.936      | 0.9742      | 0.982       |
| Dubinin–Radushkevich               | $Q_{DR}$ (mg.g <sup>-1</sup> )                | 232.04     | 301.62      | 354.2       |
|                                    | $K_{DR}$ (mol <sup>2</sup> /kJ <sup>2</sup> ) | 2.40711E-5 | 1.38638E-5  | 4.03151E-6  |
|                                    | Ea (kJ/mol)                                   | 30.18      | 31.62       | 33.2        |
|                                    | Reduced Chi-Sqr                               | 589.4937   | 1525.39951  | 2277.97539  |
|                                    | Residual Sum of Squares                       | 9431.89916 | 24406.39216 | 36447.60617 |
|                                    | R-Square (COD)                                | 0.92794    | 0.89552     | 0.88848     |
|                                    | Adj. R-Square                                 | 0.92344    | 0.88899     | 0.88151     |
|                                    | $R^2$                                         | 0.924      | 0.884       | 0.882       |
| Temkin                             | $b_T$ (J/mol)                                 | 39.9       | 29.15       | 24.54       |
|                                    | $K_T$ (L/mol)                                 | 0.432      | 0.57        | 1.14        |
|                                    | Reduced Chi-Sqr                               | 60.66051   | 68.56615    | 305.5601    |

|         |                         |           |            |            |
|---------|-------------------------|-----------|------------|------------|
| Jossens | Residual Sum of Squares | 970.56819 | 1097.05834 | 4888.96157 |
|         | R-Square (COD)          | 0.99259   | 0.9953     | 0.98504    |
|         | Adj. R-Square           | 0.99212   | 0.99501    | 0.98411    |
|         | R <sup>2</sup>          | 0.9932    | 0.9952     | 0.985      |
|         | K                       | 10.78     | 23.06      | 58.6       |
|         | J                       | 0.024     | 0.092      | 0.25       |
|         | Reduced Chi-Sqr         | 19.16068  | 33.25771   | 43.26554   |
|         | Residual Sum of Squares | 287.41026 | 498.86567  | 648.98312  |
|         | R-Square (COD)          | 0.9978    | 0.99786    | 0.99801    |
|         | Adj. R-Square           | 0.99751   | 0.99758    | 0.99775    |
|         | R <sup>2</sup>          | 0.9962    | 0.9965     | 0.998      |

Table S8. Models of adsorption kinetic parameters of Cd(II) ions on FAACP hydrogel beads.

| Model                      | Value of parameters                         |                                                                |            |            |
|----------------------------|---------------------------------------------|----------------------------------------------------------------|------------|------------|
|                            | Parameters                                  | 25 °C                                                          | 35 °C      | 45 °C      |
| Pseudo-First-order kinetic | $K_1$ (min <sup>-1</sup> )x10 <sup>-2</sup> | 0.022                                                          | 0.028      | 0.032      |
|                            | Reduced Chi-Sqr                             | 7.90845                                                        | 15.83493   | 22.00265   |
|                            | Residual Sum of Squares                     | 150.26052                                                      | 300.86364  | 418.05031  |
|                            | R-Square (COD)                              | 0.99865                                                        | 0.99724    | 0.98724    |
|                            | Adj. R-Square                               | 0.99858                                                        | 0.9977     | 0.9776     |
|                            | R <sup>2</sup>                              | 0.996                                                          | 0.9958     | 0.981      |
|                            | Pseudo-second-order kinetic                 | $K_2$ (g.mg <sup>-1</sup> min <sup>-1</sup> )x10 <sup>-2</sup> | 8.34168E-5 | 5.89495E-5 |
| q <sub>e</sub> (mg/g)      |                                             | 255.6                                                          | 358.2      | 422.4      |
| Reduced Chi-Sqr            |                                             | 10.03849                                                       | 20.09988   | 27.9288    |
| Residual Sum of Squares    |                                             | 190.73137                                                      | 381.89769  | 530.64719  |
| R-Square (COD)             |                                             | 0.99829                                                        | 0.9974     | 0.98754    |
| Adj. R-Square              |                                             | 0.9982                                                         | 0.9968     | 0.9868     |
| R <sup>2</sup>             |                                             | 0.9981                                                         | 0.996      | 0.971      |

|                         |                                                  |            |            |            |
|-------------------------|--------------------------------------------------|------------|------------|------------|
| Intraparticle diffusion | $K_i$ (mgg <sup>-1</sup> min <sup>1/2</sup> )    | 27.38029   | 38.74      | 45.66      |
|                         | X (mg/g)                                         | 2.005      | 2.83       | 3.34       |
|                         | Reduced Chi-Sqr                                  | 155.19909  | 310.75217  | 431.79043  |
|                         | Residual Sum of Squares                          | 2948.78262 | 5904.29121 | 8204.01825 |
|                         | R-Square (COD)                                   | 0.97352    | 0.9728     | 0.97418    |
|                         | Adj. R-Square                                    | 0.97212    | 0.9734     | 0.97402    |
|                         | R <sup>2</sup>                                   | 0.973      | 0.982      | 0.974      |
| Elovich                 | $\beta$ (g/mg)                                   | 77.89      | 110.22     | 129.93     |
|                         | $\alpha$ (mgg <sup>-1</sup> .min <sup>-1</sup> ) | 0.00358    | 0.00253    | 0.00215    |
|                         | Reduced Chi-Sqr                                  | 26.32628   | 52.71261   | 73.24422   |
|                         | Residual Sum of Squares                          | 500.19939  | 1001.53956 | 1391.64017 |
|                         | R-Square (COD)                                   | 0.99551    | 0.9962     | 0.9881     |
|                         | Adj. R-Square                                    | 0.99527    | 0.9968     | 0.9876     |
|                         | R <sup>2</sup>                                   | 0.9948     | 0.997      | 0.9854     |
| Experimental data       | $q_e$ (exp) (mmol/g)                             | 253.2      | 361.6      | 425.1      |

Table S9. The thermodynamic parameters.

| T (K) | $\Delta G$ (kJ/mol) | $\Delta H^\circ$ (kJ/mol) | $\Delta S^\circ$ (J/mol.K) |
|-------|---------------------|---------------------------|----------------------------|
| 293   | -0.67826            |                           |                            |
| 298   | -2.21302            | 89.25                     | 306.95                     |
| 303   | -3.74778            |                           |                            |
| 308   | -5.28255            |                           |                            |
| 313   | -6.81731            |                           |                            |
| 318   | -8.35208            |                           |                            |

Table S10. Characteristic of the real water samples.

| <b>Parameter</b>                                    | <b>Tap Water</b>                                            | <b>Sea Water</b>                                          | <b>Waste water</b>                                                   |
|-----------------------------------------------------|-------------------------------------------------------------|-----------------------------------------------------------|----------------------------------------------------------------------|
| pH                                                  | 7.6                                                         | 8.4                                                       | 4.8                                                                  |
| Total Dissolved Solids (mg/L)                       | 384.8                                                       | 22177                                                     | 3564                                                                 |
| Turbidity (NTU)                                     | 1.4                                                         | 3.1                                                       | 30.64                                                                |
| Electrical Conductivity ( $\mu\text{S}/\text{cm}$ ) | 580                                                         | 33600                                                     | 5400                                                                 |
| Total Hardness (as $\text{CaCO}_3$ , mg/L)          | 194                                                         | 5850                                                      | 740                                                                  |
| $\text{Mg}^{2+}$ (mg/L)                             | 26                                                          | 1280                                                      | 136                                                                  |
| $\text{Ca}^{2+}$ (mg/L)                             | 74                                                          | 396                                                       | 184                                                                  |
| $\text{K}^{+}$ (mg/L)                               | 6.1                                                         | 374                                                       | 62                                                                   |
| $\text{Cl}^{-}$ (mg/L)                              | 114                                                         | 20600                                                     | 1360                                                                 |
| $\text{Na}^{+}$ (mg/L)                              | 72                                                          | 9450                                                      | 870                                                                  |
| $\text{HCO}_3^{-}$ (mg/L)                           | 186                                                         | 131                                                       | 320                                                                  |
| $\text{SO}_4^{2-}$ (mg/L)                           | 84                                                          | 3250                                                      | 614                                                                  |
| Fe (mg/L)                                           | 0.06                                                        | 0.61                                                      | 3.2                                                                  |
| Mn (mg/L)                                           | 0.05                                                        | 0.08                                                      | 1.4                                                                  |
| Ni (mg/L)                                           | 0.60                                                        | 0.70                                                      | 2.8                                                                  |
| Zn (mg/L)                                           | 0.16                                                        | 0.12                                                      | 12.4                                                                 |
| Chemical Oxygen Demand (COD, mg/L)                  | 20                                                          | 36                                                        | 845                                                                  |
| Total Organic Carbon (TOC, mg/L)                    | 2.84                                                        | 6.2                                                       | 188                                                                  |
| Residual Chlorine (mg/L)                            | 0.56                                                        | 0.4                                                       | ND                                                                   |
| Dominant Interfering Substances                     | $\text{Ca}^{2+}$ , $\text{Mg}^{2+}$ ,<br>$\text{HCO}_3^{-}$ | $\text{Na}^{+}$ , $\text{Cl}^{-}$ ,<br>$\text{SO}_4^{2-}$ | $\text{Zn}^{2+}$ , $\text{Fe}^{2+}$ , $\text{Cu}^{2+}$ ,<br>organics |
| Cd(II) Removal Efficiency (%)                       | 96.2                                                        | 82.6                                                      | 91.2                                                                 |

Table S11. Comparison of Cd(II) ions adsorption capacity in various adsorbents.

| <b>Materials</b>                                                       | <b><math>Q_e</math><br/>(mg/g)</b> | <b>Initial<br/>concentration<br/>(mg/L)</b> | <b>pH</b> | <b>Adsorbent<br/>dose (g/L)</b> | <b>Ref.</b> |
|------------------------------------------------------------------------|------------------------------------|---------------------------------------------|-----------|---------------------------------|-------------|
| <i>Canna indica</i> -derived biochar                                   | 188.8                              | 10–300                                      | 5         | 0.5                             | [13]        |
| Methylisothiocyanate decorated<br>PAMAM dendrimer/mesoporous<br>silica | 97.8                               | 10–200                                      | 6         | 0.2                             | [14]        |
| Cellulose/<br>ethylenediaminetetraacetic acid                          | 33.2                               | 10–150                                      | 5.5       | 1                               | [15]        |
| Carboxymethyl<br>cellulose/polyacrylamide                              | 256.4                              | 20–300                                      | 6         | 0.5                             | [16]        |
| TiO <sub>2</sub> /glutaraldehyde/carboxymethyl<br>cellulose            | 274.28                             | 10–300                                      | 5.5       | 0.5                             | [17]        |
| Graphene oxide/carboxymethyl<br>cellulose                              | 46.13                              | 10–200                                      | 5         | 0.5                             | [18]        |
| Poly(vinyl alcohol)/chitosan                                           | 148                                | 10–200                                      | 5.5       | 0.5                             | [19]        |
| Poly(glycidyl<br>methacrylate)/cellulose/<br>iminodiacetic acid        | 53.4                               | 10–150                                      | 6         | 0.3                             | [20]        |
| Chelating polyacrylonitrile                                            | 146                                | 10–200                                      | 5.5       | 0.5                             | [21]        |
| Polyacrylonitrile/Na-Y-<br>zeolite/amidoxime                           | 39.4                               | 10–150                                      | 5         | 0.5                             | [22]        |
| Cellulose nanocrystalline                                              | 57.76                              | 10–200                                      | 5.5       | 0.5                             | [23]        |
| Amidoxime chelating resin                                              | 20.7                               | 10–100                                      | 5         | 0.5                             | [24]        |
| Blue algae-derived biochar                                             | 135.7                              | 10–250                                      | 5.5       | 0.5                             | [25]        |
| Fe/Zn/ <i>durian shells</i> biochar                                    | 99.83                              | 10–200                                      | 5         | 0.5                             | [26]        |
| Struvite/attapulgitite                                                 | 121.14                             | 10–250                                      | 6         | 0.5                             | [27]        |
| Biochar derived-sewage                                                 | 127.9                              | 20–300                                      | 5.5       | 0.5                             | [28]        |

|                                      |        |        |     |     |          |
|--------------------------------------|--------|--------|-----|-----|----------|
| sludge/calcium sulfate               |        |        |     |     |          |
| Danthron/MWCNTs                      | 52.9   | 10–200 | 5.5 | 0.2 | [29]     |
| Hydroxyapatite                       | 12.36  | 10–100 | 6   | 1   | [30]     |
| Ca-Mg phosphate based on<br>dolomite | 241.7  | 20–300 | 5.5 | 0.5 | [31]     |
| Unmodified Cel                       | 13.6   | 10–100 | 5   | 0.5 | [32]     |
| Cel/PAN/AO                           | 123.23 | 10–200 | 5.5 | 0.5 | [32]     |
| FAACP Hydrogel beads                 | 254.57 | 10–300 | 6   | 0.8 | This wor |

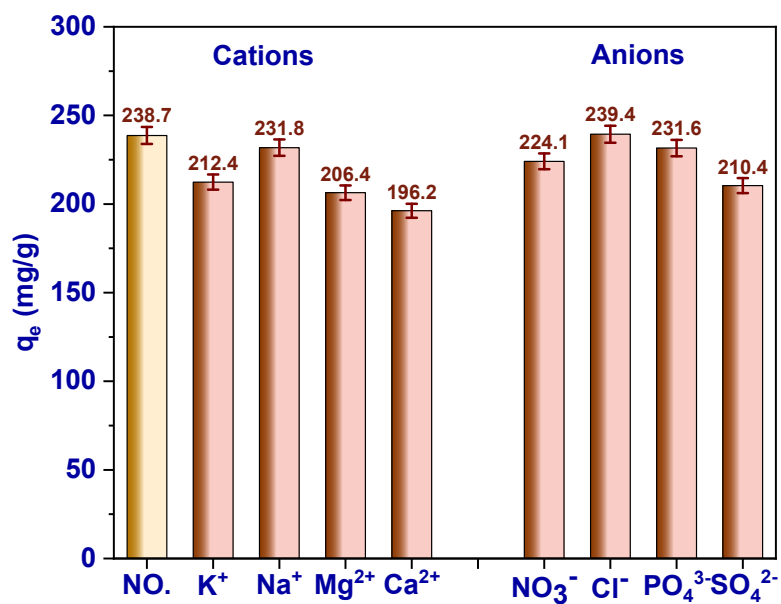

Fig. S1. Effect of interference ions.

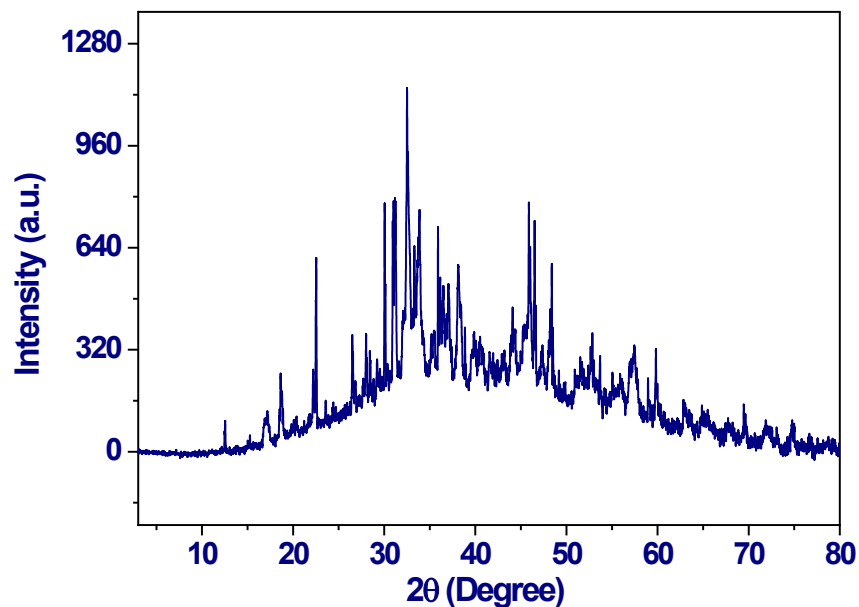

Fig. S2. XRD pattern of regenerated FAACP.

## References

- [1] I. Langmuir, The constitution and fundamental properties of solids and liquids. Part I. Solids, *J. Am. Chem. Soc.*, 38 (1916) 2221-2295.
- [2] H.M.F. Freundlich, Over the adsorption in solution, *J. Phys. Chem.*, 57 (1906) 385-471.
- [3] M. Dubinin, The equation of the characteristic curve of activated charcoal, *Proc. Acad. Sci. USSR Phys. Chem. Sect.*, 55 (1947) 327-329.
- [4] V.P. M.I. Tempkin, Kinetics of ammonia synthesis on promoted iron catalyst, *Acta Phys. Chim. USSR*, 12 (1940) 327-356.
- [5] J. Bayuo, K.B. Pelig-Ba, M.A. Abukari, Isotherm modeling of lead (II) adsorption from aqueous solution using groundnut shell as a low-cost adsorbent, *IOSR J Appl Chem (IOSR-JAC)*, 11 (2018) 18-23.
- [6] S.K. Lagergren, About the theory of so-called adsorption of soluble substances, *Sven. Vetenskapsakad. Handlingar*, 24 (1898) 1-39.
- [7] Y.-S. Ho, G. McKay, Sorption of dye from aqueous solution by peat, *Chemical engineering journal*, 70 (1998) 115-124.
- [8] W.J. Weber Jr, J.C. Morris, Kinetics of adsorption on carbon from solution, *J. Sanit. Eng. Div.*, 89 (1963) 31-59.

- [9] M.H. Dehghani, A. Dehghan, A. Najafpoor, Removing Reactive Red 120 and 196 using chitosan/zeolite composite from aqueous solutions: Kinetics, isotherms, and process optimization, *Journal of Industrial and Engineering Chemistry*, 51 (2017) 185-195.
- [10] E.C. Lima, A. Hosseini-Bandegharaei, J.C. Moreno-Piraján, I. Anastopoulos, A critical review of the estimation of the thermodynamic parameters on adsorption equilibria. Wrong use of equilibrium constant in the Van't Hoof equation for calculation of thermodynamic parameters of adsorption, *Journal of molecular liquids*, 273 (2019) 425-434.
- [11] H.N. Tran, S.-J. You, A. Hosseini-Bandegharaei, H.-P. Chao, Mistakes and inconsistencies regarding adsorption of contaminants from aqueous solutions: a critical review, *Water research*, 120 (2017) 88-116.
- [12] B. Oladipo, E. Govender-Opitz, T.V. Ojumu, Kinetics, thermodynamics, and mechanism of Cu (II) ion sorption by biogenic iron precipitate: using the lens of wastewater treatment to diagnose a typical biohydrometallurgical problem, *ACS omega*, 6 (2021) 27984-27993.
- [13] X. Cui, S. Fang, Y. Yao, T. Li, Q. Ni, X. Yang, Z. He, Potential mechanisms of cadmium removal from aqueous solution by *Canna indica* derived biochar, *Science of the Total Environment*, 562 (2016) 517-525.
- [14] L. Luan, B. Tang, Y. Liu, W. Xu, Y. Liu, A. Wang, Y. Niu, Direct synthesis of sulfur-decorating PAMAM dendrimer/mesoporous silica for enhanced Hg (II) and Cd (II) adsorption, *Langmuir*, 38 (2022) 698-710.
- [15] A. Daochalermwong, N. Chanka, K. Songsrirote, P. Dittanet, C. Niamnuy, A. Seubsai, Removal of heavy metal ions using modified celluloses prepared from pineapple leaf fiber, *ACS omega*, 5 (2020) 5285-5296.
- [16] C.B. Godiya, X. Cheng, D. Li, Z. Chen, X. Lu, Carboxymethyl cellulose/polyacrylamide composite hydrogel for cascaded treatment/reuse of heavy metal ions in wastewater, *Journal of hazardous materials*, 364 (2019) 28-38.
- [17] M.E. Mahmoud, A.E. Abdou, M.E. Sobhy, N.A. Fekry, Solid–solid crosslinking of carboxymethyl cellulose nanolayer on titanium oxide nanoparticles as a novel biocomposite for efficient removal of toxic heavy metals from water, *International journal of biological macromolecules*, 105 (2017) 1269-1278.
- [18] Y. Zhang, Y. Liu, X. Wang, Z. Sun, J. Ma, T. Wu, F. Xing, J. Gao, Porous graphene oxide/carboxymethyl cellulose monoliths, with high metal ion adsorption, *Carbohydrate polymers*, 101 (2014) 392-400.
- [19] M.R. Karim, M.O. Aijaz, N.H. Alharth, H.F. Alharbi, F.S. Al-Mubaddel, M.R. Awual, Composite nanofibers membranes of poly (vinyl alcohol)/chitosan for selective lead (II) and cadmium (II) ions removal from wastewater, *Ecotoxicology and environmental safety*, 169 (2019) 479-486.
- [20] M. Barsbay, P.A. Kavaklı, S. Tilki, C. Kavaklı, O. Güven, Porous cellulosic adsorbent for the removal of Cd (II), Pb (II) and Cu (II) ions from aqueous media, *Radiation Physics and Chemistry*, 142 (2018) 70-76.
- [21] P. Bhunia, S. Chatterjee, P. Rudra, S. De, Chelating polyacrylonitrile beads for removal of lead and cadmium from wastewater, *Separation and Purification Technology*, 193 (2018) 202-213.
- [22] K. Elwakeel, A. El-Bindary, E. Kouta, E. Guibal, Functionalization of polyacrylonitrile/Na-Y-zeolite composite with amidoxime groups for the sorption of Cu (II), Cd (II) and Pb (II) metal ions, *Chemical Engineering Journal*, 332 (2018) 727-736.
- [23] H.T. Kara, S.T. Anshebo, F.K. Sabir, Adsorptive removal of Cd (II) ions from wastewater using maleic anhydride nanocellulose, *Journal of Nanotechnology*, 2021 (2021) 9966811.
- [24] C. Zheng, C. He, Y. Yang, T. Fujita, G. Wang, W. Yang, Characterization of waste amidoxime chelating resin and its reutilization performance in adsorption of Pb (II), Cu (II), Cd (II) and Zn (II) Ions, *Metals*, 12 (2022) 149.
- [25] P. Liu, D. Rao, L. Zou, Y. Teng, H. Yu, Capacity and potential mechanisms of Cd (II) adsorption from aqueous solution by blue algae-derived biochars, *Science of the Total Environment*, 767 (2021) 145447.

- [26] T. Yang, Y. Xu, Q. Huang, Y. Sun, X. Liang, L. Wang, X. Qin, L. Zhao, Adsorption characteristics and the removal mechanism of two novel Fe-Zn composite modified biochar for Cd (II) in water, *Bioresource technology*, 333 (2021) 125078.
- [27] H. Wang, X. Wang, J. Ma, P. Xia, J. Zhao, Removal of cadmium (II) from aqueous solution: a comparative study of raw attapulgite clay and a reusable waste–struvite/attapulgite obtained from nutrient-rich wastewater, *Journal of hazardous materials*, 329 (2017) 66-76.
- [28] L. Liu, T. Yue, R. Liu, H. Lin, D. Wang, B. Li, Efficient absorptive removal of Cd ( II ) in aqueous solution by biochar derived from sewage sludge and calcium sulfate, *Bioresource Technology*, 336 (2021) 125333.
- [29] T. Shahryari, P. Singh, P. Raizada, A. Davidyants, L. Thangavelu, S. Sivamani, A. Naseri, F. Vahidipour, A. Ivanets, A. Hosseini-Bandegharai, Adsorption properties of Danthron-impregnated carbon nanotubes and their usage for solid phase extraction of heavy metal ions, *Colloids and surfaces A: physicochemical and engineering aspects*, 641 (2022) 128528.
- [30] A. Ivanets, N. Kitikova, I. Shashkova, M.Y. Roshchina, V. Srivastava, M. Sillanpää, Adsorption performance of hydroxyapatite with different crystalline and porous structure towards metal ions in multicomponent solution, *Journal of Water Process Engineering*, 32 (2019) 100963.
- [31] A. Ivanets, V. Srivastava, N. Kitikova, I. Shashkova, M. Sillanpää, Non-apatite Ca-Mg phosphate sorbent for removal of toxic metal ions from aqueous solutions, *Journal of environmental chemical engineering*, 5 (2017) 2010-2017.
- [32] H.A. Abdelmonem, T.F. Hassanein, H.E. Sharafeldin, H. Gomaa, A.S. Ahmed, A.M. Abdel-lateef, E.M. Allam, M.F. Cheira, M.E. Eissa, A.H. Tilp, Cellulose-embedded polyacrylonitrile/amidoxime for the removal of cadmium (II) from wastewater: Adsorption performance and proposed mechanism, *Colloids and Surfaces A: Physicochemical and Engineering Aspects*, 684 (2024) 133081.
